# Supplementary material
Source: Springer Nature journal article supplement (https://www.springermedizin.de/resource/supplementary/13033_2012_133_MOESM1_ESM.pdf/9651886)

# Fatal accidents per 1000 persons employed by regions\*

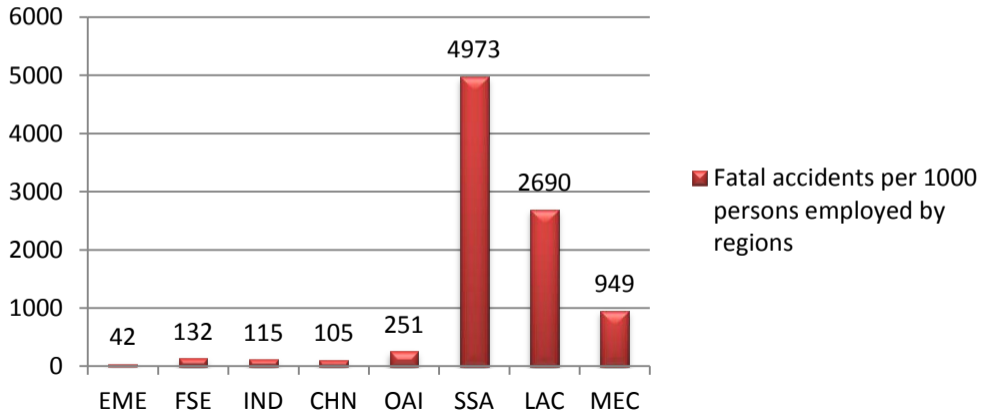

Supplement: MOESM1 [file 9651886]
